## Correction: Inhibition of IRE1 $\alpha$ -driven pro-survival pathways is a promising therapeutic application in acute myeloid leukemia

**Haibo Sun, De-Chen Lin, Xiao Guo, Behzad Kharabi Masouleh, Sigal Gery, Qi Cao, Serhan Alkan, Takayuki Ikezoe, Chie Akiba, Ronald Paquette, Wenwen Chien, Carsten Müller-Tidow, Yang Jing, Konstantin Agelopoulos, Markus Müschen, H. Phillip Koeffler**

Copyright: Sun et al. This is an open-access article distributed under the terms of the Creative Commons Attribution License 3.0 (CC BY 3.0), which permits unrestricted use, distribution, and reproduction in any medium, provided the original author and source are credited.

**Present:** The grant information is incomplete.

**Correct:** Additional grant information is shown below.

Original article: Oncotarget. 2016; 7:18736-18749. <https://doi.org/10.18632/oncotarget.7702>

### GRANT SUPPORT

National Natural Science Foundation of China (NSFC, 31401594, to X.G).
